# Supplementary material
Source: publisher figshare collection journal article supplement (https://tandf.figshare.com/articles/dataset/_/9203459)
Supplement: Supplementary file 1 [file 1]

**Table S3****Mo and U data from the ca. 2.2–0.54 Ga carbonates in global shallow oceans****(rarely relative with terrigenous contamination and diagenetic alteration; Th < 0.5 µg/g)**

| Sample | Lithology | Section | Member, Fm., Group | Acid for rock dissolution              | Age (Ga) | Mo (µg/g) | U (µg/g) | Th (µg/g) | Mo <sub>EF</sub> | U <sub>EF</sub> | references        |
|--------|-----------|---------|--------------------|----------------------------------------|----------|-----------|----------|-----------|------------------|-----------------|-------------------|
| D-1    | Dolostone | Yangtze | BMT, Dengying Fm.  | HF/HNO <sub>3</sub> /HClO <sub>4</sub> | 0.55     | 10.8      | 1.72     | 0.14      | 1130             | 57.9            | Tian et al., 2017 |
| D-2    | Dolostone | Yangtze | BMT, Dengying Fm.  | HF/HNO <sub>3</sub> /HClO <sub>4</sub> | 0.55     | 6.26      | 1.51     | 0.14      | 652.8            | 50.8            | Tian et al., 2017 |
| BMT-1  | Dolostone | Yangtze | BMT, Dengying Fm.  | HF/HNO <sub>3</sub> /HClO <sub>4</sub> | 0.55     | 0.97      | 1.55     | 0.13      | 108.9            | 56.2            | Tian et al., 2017 |
| BMY-10 | Dolostone | Yangtze | BMT, Dengying Fm.  | HF/HNO <sub>3</sub> /HClO <sub>4</sub> | 0.55     | 1.34      | 0.56     | 0.21      | 93.16            | 12.6            | Tian et al., 2017 |
| BMT-9  | Dolostone | Yangtze | BMT, Dengying Fm.  | HF/HNO <sub>3</sub> /HClO <sub>4</sub> | 0.55     | 0.94      | 0.62     | 0.1       | 137.2            | 29.2            | Tian et al., 2017 |
| BMT-8  | Dolostone | Yangtze | BMT, Dengying Fm.  | HF/HNO <sub>3</sub> /HClO <sub>4</sub> | 0.55     | 8.12      | 0.66     | 0.12      | 987.9            | 25.9            | Tian et al., 2017 |
| BMT-7  | Dolostone | Yangtze | BMT, Dengying Fm.  | HF/HNO <sub>3</sub> /HClO <sub>4</sub> | 0.55     | 7.42      | 1.58     | 0.13      | 833.3            | 57.2            | Tian et al., 2017 |
| BMT-6  | Dolostone | Yangtze | BMT, Dengying Fm.  | HF/HNO <sub>3</sub> /HClO <sub>4</sub> | 0.55     | 3.58      | 0.56     | 0.03      | 1742             | 87.9            | Tian et al., 2017 |
| BMT-5  | Dolostone | Yangtze | BMT, Dengying Fm.  | HF/HNO <sub>3</sub> /HClO <sub>4</sub> | 0.55     | 13.3      | 1.19     | 0.23      | 841.7            | 24.4            | Tian et al., 2017 |
| BMT-4  | Dolostone | Yangtze | BMT, Dengying Fm.  | HF/HNO <sub>3</sub> /HClO <sub>4</sub> | 0.55     | 9.16      | 0.66     | 0.06      | 2229             | 51.8            | Tian et al., 2017 |
| BMT-3  | Dolostone | Yangtze | BMT, Dengying Fm.  | HF/HNO <sub>3</sub> /HClO <sub>4</sub> | 0.55     | 4.4       | 0.65     | 0.12      | 535.3            | 25.5            | Tian et al., 2017 |
| BMT-2  | Dolostone | Yangtze | BMT, Dengying Fm.  | HF/HNO <sub>3</sub> /HClO <sub>4</sub> | 0.55     | 0.84      | 0.83     | 0.03      | 408.8            | 130             | Tian et al., 2017 |
| BMT-11 | Dolostone | Yangtze | BMT, Dengying Fm.  | HF/HNO <sub>3</sub> /HClO <sub>4</sub> | 0.55     | 1.02      | 0.34     | 0.04      | 372.3            | 40              | Tian et al., 2017 |
| BMT-13 | Dolostone | Yangtze | BMT, Dengying Fm.  | HF/HNO <sub>3</sub> /HClO <sub>4</sub> | 0.55     | 0.3       | 0.34     | 0.16      | 27.38            | 10              | Tian et al., 2017 |
| BMT-14 | Dolostone | Yangtze | BMT, Dengying Fm.  | HF/HNO <sub>3</sub> /HClO <sub>4</sub> | 0.55     | 0.22      | 0.3      | 0.04      | 80.3             | 35.3            | Tian et al., 2017 |
| BMT-15 | Dolostone | Yangtze | BMT, Dengying Fm.  | HF/HNO <sub>3</sub> /HClO <sub>4</sub> | 0.55     | 0.17      | 0.36     | 0.03      | 82.73            | 56.5            | Tian et al., 2017 |
| BMT-16 | Dolostone | Yangtze | BMT, Dengying Fm.  | HF/HNO <sub>3</sub> /HClO <sub>4</sub> | 0.55     | 0.36      | 2.52     | 0.21      | 25.03            | 56.5            | Tian et al., 2017 |
| BMT-17 | Dolostone | Yangtze | BMT, Dengying Fm.  | HF/HNO <sub>3</sub> /HClO <sub>4</sub> | 0.55     | 0.12      | 4.71     | 0.04      | 43.8             | 555             | Tian et al., 2017 |
| S-1    | Dolostone | Yangtze | BMT, Dengying Fm.  | HF/HNO <sub>3</sub> /HClO <sub>4</sub> | 0.55     | 0.34      | 0.66     | 0.09      | 55.16            | 34.5            | Tian et al., 2017 |
| S-2    | Dolostone | Yangtze | BMT, Dengying Fm.  | HF/HNO <sub>3</sub> /HClO <sub>4</sub> | 0.55     | 0.2       | 0.36     | 0.1       | 29.2             | 17              | Tian et al., 2017 |
| SBT-2  | Limestone | Yangtze | STB, Dengying Fm.  | HF/HNO <sub>3</sub> /HClO <sub>4</sub> | 0.55     | 0.27      | 2.82     | 0.24      | 16.43            | 55.3            | Tian et al., 2017 |
| SBT-3  | Limestone | Yangtze | STB, Dengying Fm.  | HF/HNO <sub>3</sub> /HClO <sub>4</sub> | 0.55     | 0.17      | 1.33     | 0.14      | 17.73            | 44.7            | Tian et al., 2017 |
| SBT-1  | Limestone | Yangtze | STB, Dengying Fm.  | HF/HNO <sub>3</sub> /HClO <sub>4</sub> | 0.55     | 0.14      | 1.45     | 0.11      | 18.58            | 62.1            | Tian et al., 2017 |
| SBT-5  | Limestone | Yangtze | STB, Dengying Fm.  | HF/HNO <sub>3</sub> /HClO <sub>4</sub> | 0.55     | 0.11      | 0.95     | 0.03      | 53.53            | 149             | Tian et al., 2017 |
| SBT-4  | Dolostone | Yangtze | STB, Dengying Fm.  | HF/HNO <sub>3</sub> /HClO <sub>4</sub> | 0.55     | 0.12      | 0.83     | 0.03      | 58.4             | 130             | Tian et al., 2017 |

|           |                       |         |                        |                                        |      |      |      |      |       |      |                   |
|-----------|-----------------------|---------|------------------------|----------------------------------------|------|------|------|------|-------|------|-------------------|
| SBT-6     | Limestone             | Yangtze | STB, Dengying Fm.      | HF/HNO <sub>3</sub> /HClO <sub>4</sub> | 0.55 | 0.07 | 0.57 | 0.02 | 51.1  | 134  | Tian et al., 2017 |
| SBT-7     | Limestone             | Yangtze | STB, Dengying Fm.      | HF/HNO <sub>3</sub> /HClO <sub>4</sub> | 0.55 | 0.16 | 1.06 | 0.09 | 25.96 | 55.5 | Tian et al., 2017 |
| SBT-8     | Limestone             | Yangtze | STB, Dengying Fm.      | HF/HNO <sub>3</sub> /HClO <sub>4</sub> | 0.55 | 0.27 | 1.82 | 0.12 | 32.85 | 71.4 | Tian et al., 2017 |
| SBT-9     | Limestone             | Yangtze | STB, Dengying Fm.      | HF/HNO <sub>3</sub> /HClO <sub>4</sub> | 0.55 | 0.12 | 0.7  | 0.32 | 5.475 | 10.3 | Tian et al., 2017 |
| SBT-10    | Limestone             | Yangtze | STB, Dengying Fm.      | HF/HNO <sub>3</sub> /HClO <sub>4</sub> | 0.55 | 0.08 | 0.98 | 0.05 | 23.36 | 92.3 | Tian et al., 2017 |
| SBT-11    | Limestone             | Yangtze | STB, Dengying Fm.      | HF/HNO <sub>3</sub> /HClO <sub>4</sub> | 0.55 | 0.16 | 1.87 | 0.09 | 25.96 | 97.9 | Tian et al., 2017 |
| SBT-12    | Limestone             | Yangtze | STB, Dengying Fm.      | HF/HNO <sub>3</sub> /HClO <sub>4</sub> | 0.55 | 0.08 | 1.07 | 0.05 | 23.36 | 101  | Tian et al., 2017 |
| SBT-13    | Limestone             | Yangtze | STB, Dengying Fm.      | HF/HNO <sub>3</sub> /HClO <sub>4</sub> | 0.55 | 0.19 | 1.7  | 0.09 | 30.82 | 89   | Tian et al., 2017 |
| SBT-14    | Limestone             | Yangtze | STB, Dengying Fm.      | HF/HNO <sub>3</sub> /HClO <sub>4</sub> | 0.55 | 0.2  | 0.75 | 0.06 | 48.67 | 58.9 | Tian et al., 2017 |
| S-B-1     | Limestone             | Yangtze | STB, Dengying Fm.      | HF/HNO <sub>3</sub> /HClO <sub>4</sub> | 0.55 | 0.29 | 1.26 | 0.14 | 30.24 | 42.4 | Tian et al., 2017 |
| S-B-2     | Limestone             | Yangtze | STB, Dengying Fm.      | HF/HNO <sub>3</sub> /HClO <sub>4</sub> | 0.55 | 0.29 | 1.39 | 0.1  | 42.34 | 65.5 | Tian et al., 2017 |
| S-B-3     | Dolostone             | Yangtze | HMJ, Dengying Fm.      | HF/HNO <sub>3</sub> /HClO <sub>4</sub> | 0.55 | 0.12 | 0.89 | 0.08 | 21.9  | 52.4 | Tian et al., 2017 |
| H-1       | Dolostone             | Yangtze | HMJ, Dengying Fm.      | HF/HNO <sub>3</sub> /HClO <sub>4</sub> | 0.55 | 0.39 | 0.56 | 0.39 | 14.6  | 6.76 | Tian et al., 2017 |
| H-3       | Dolostone             | Yangtze | HMJ, Dengying Fm.      | HF/HNO <sub>3</sub> /HClO <sub>4</sub> | 0.55 | 0.15 | 0.31 | 0.14 | 15.64 | 10.4 | Tian et al., 2017 |
| TJDST-165 | Dolostone             | Yangtze | Mb-III, Doushantuo Fm. | HF/HNO <sub>3</sub> /HClO <sub>4</sub> | 0.59 | 0.41 | 0.82 | 0.21 | 28.51 | 18.4 | Tian et al., 2017 |
| TJDST-164 | Dolostone             | Yangtze | Mb-III, Doushantuo Fm. | HF/HNO <sub>3</sub> /HClO <sub>4</sub> | 0.59 | 0.09 | 0.58 | 0.02 | 65.7  | 137  | Tian et al., 2017 |
| TJDST-163 | Dolostone             | Yangtze | Mb-III, Doushantuo Fm. | HF/HNO <sub>3</sub> /HClO <sub>4</sub> | 0.59 | 0.18 | 0.59 | 0.02 | 131.4 | 139  | Tian et al., 2017 |
| TJDST-161 | Dolostone             | Yangtze | Mb-III, Doushantuo Fm. | HF/HNO <sub>3</sub> /HClO <sub>4</sub> | 0.59 | 0.31 | 0.46 | 0.06 | 75.43 | 36.1 | Tian et al., 2017 |
| TJDST-160 | Dolostone             | Yangtze | Mb-III, Doushantuo Fm. | HF/HNO <sub>3</sub> /HClO <sub>4</sub> | 0.59 | 0.46 | 0.84 | 0.1  | 67.16 | 39.6 | Tian et al., 2017 |
| TJDST-159 | Dolostone             | Yangtze | Mb-III, Doushantuo Fm. | HF/HNO <sub>3</sub> /HClO <sub>4</sub> | 0.59 | 1.59 | 1.31 | 0.09 | 257.9 | 68.6 | Tian et al., 2017 |
| TJDST-156 | Dolostone             | Yangtze | Mb-III, Doushantuo Fm. | HF/HNO <sub>3</sub> /HClO <sub>4</sub> | 0.59 | 0.58 | 0.77 | 0.2  | 42.34 | 18.1 | Tian et al., 2017 |
| TJDST-154 | Dolostone             | Yangtze | Mb-III, Doushantuo Fm. | HF/HNO <sub>3</sub> /HClO <sub>4</sub> | 0.59 | 0.75 | 0.39 | 0.24 | 45.63 | 7.65 | Tian et al., 2017 |
| TJDST-153 | Dolostone             | Yangtze | Mb-III, Doushantuo Fm. | HF/HNO <sub>3</sub> /HClO <sub>4</sub> | 0.59 | 0.46 | 0.46 | 0.34 | 19.75 | 6.37 | Tian et al., 2017 |
| TJDST-150 | Argillaceous dolomite | Yangtze | Mb-III, Doushantuo Fm. | HF/HNO <sub>3</sub> /HClO <sub>4</sub> | 0.59 | 0.32 | 0.26 | 0.13 | 35.94 | 9.42 | Tian et al., 2017 |
| TJDST-149 | Argillaceous dolomite | Yangtze | Mb-III, Doushantuo Fm. | HF/HNO <sub>3</sub> /HClO <sub>4</sub> | 0.59 | 0.47 | 0.49 | 0.16 | 42.89 | 14.4 | Tian et al., 2017 |
| D3-3      | Dolostone             | Yangtze | Mb-III, Doushantuo Fm. | HF/HNO <sub>3</sub> /HClO <sub>4</sub> | 0.59 | 6.33 | 1.56 | 0.2  | 462.1 | 36.7 | Tian et al., 2017 |
| D3-8      | Dolostone             | Yangtze | Mb-III, Doushantuo Fm. | HF/HNO <sub>3</sub> /HClO <sub>4</sub> | 0.59 | 1.24 | 2.06 | 0.24 | 75.43 | 40.4 | Tian et al., 2017 |
| DSY-11    | Argillaceous dolomite | Yangtze | Mb-III, Doushantuo Fm. | HF/HNO <sub>3</sub> /HClO <sub>4</sub> | 0.59 | 0.25 | 0.24 | 0.3  | 12.17 | 3.77 | Tian et al., 2017 |
| JLW-24    | Muddy dolostone       | Yangtze | Mb-II, Doushantuo Fm.  | HF/HNO <sub>3</sub> /HClO <sub>4</sub> | 0.61 | 0.52 | 0.5  | 0.44 | 17.26 | 5.35 | Tian et al., 2017 |
| JLW-25    | Muddy dolostone       | Yangtze | Mb-II, Doushantuo Fm.  | HF/HNO <sub>3</sub> /HClO <sub>4</sub> | 0.61 | 0.23 | 0.28 | 0.46 | 7.3   | 2.87 | Tian et al., 2017 |

|           |                 |                    |                       |                                        |      |      |      |      |       |      |                        |
|-----------|-----------------|--------------------|-----------------------|----------------------------------------|------|------|------|------|-------|------|------------------------|
| TJDST-145 | Muddy dolostone | Yangtze            | Mb-II, Doushantuo Fm. | HF/HNO <sub>3</sub> /HClO <sub>4</sub> | 0.61 | 0.15 | 0.25 | 0.46 | 4.761 | 2.56 | Tian et al., 2017      |
| TJDST-120 | Muddy dolostone | Yangtze            | Mb-II, Doushantuo Fm. | HF/HNO <sub>3</sub> /HClO <sub>4</sub> | 0.61 | 0.71 | 1.01 | 0.12 | 86.38 | 39.6 | Tian et al., 2017      |
| TJDST-76  | Muddy dolostone | Yangtze            | Mb-II, Doushantuo Fm. | HF/HNO <sub>3</sub> /HClO <sub>4</sub> | 0.61 | 0.35 | 0.52 | 0.45 | 11.36 | 5.44 | Tian et al., 2017      |
| TJDST-71  | Muddy dolostone | Yangtze            | Mb-II, Doushantuo Fm. | HF/HNO <sub>3</sub> /HClO <sub>4</sub> | 0.61 | 0.46 | 0.64 | 0.35 | 19.19 | 8.61 | Tian et al., 2017      |
| TJDST-70  | Muddy dolostone | Yangtze            | Mb-II, Doushantuo Fm. | HF/HNO <sub>3</sub> /HClO <sub>4</sub> | 0.61 | 0.32 | 0.78 | 0.45 | 10.38 | 8.16 | Tian et al., 2017      |
| TJDST-66  | Muddy dolostone | Yangtze            | Mb-II, Doushantuo Fm. | HF/HNO <sub>3</sub> /HClO <sub>4</sub> | 0.61 | 0.43 | 0.65 | 0.46 | 13.65 | 6.66 | Tian et al., 2017      |
| TJDST-56  | Muddy dolostone | Yangtze            | Mb-II, Doushantuo Fm. | HF/HNO <sub>3</sub> /HClO <sub>4</sub> | 0.61 | 0.22 | 0.82 | 0.48 | 6.692 | 8.05 | Tian et al., 2017      |
| TJDST-43  | Muddy dolostone | Yangtze            | Mb-II, Doushantuo Fm. | HF/HNO <sub>3</sub> /HClO <sub>4</sub> | 0.61 | 0.18 | 0.44 | 0.49 | 5.363 | 4.23 | Tian et al., 2017      |
| TJDST-40  | Muddy dolostone | Yangtze            | Mb-II, Doushantuo Fm. | HF/HNO <sub>3</sub> /HClO <sub>4</sub> | 0.61 | 0.17 | 0.28 | 0.33 | 7.521 | 4    | Tian et al., 2017      |
| TJDST-38  | Muddy dolostone | Yangtze            | Mb-II, Doushantuo Fm. | HF/HNO <sub>3</sub> /HClO <sub>4</sub> | 0.61 | 0.37 | 0.44 | 0.32 | 16.88 | 6.48 | Tian et al., 2017      |
| TJDST-37  | Muddy dolostone | Yangtze            | Mb-II, Doushantuo Fm. | HF/HNO <sub>3</sub> /HClO <sub>4</sub> | 0.61 | 0.19 | 0.85 | 0.49 | 5.661 | 8.17 | Tian et al., 2017      |
| TJDST-36  | Muddy dolostone | Yangtze            | Mb-II, Doushantuo Fm. | HF/HNO <sub>3</sub> /HClO <sub>4</sub> | 0.61 | 0.16 | 0.83 | 0.38 | 6.147 | 10.3 | Tian et al., 2017      |
| TJDST-35  | Muddy dolostone | Yangtze            | Mb-II, Doushantuo Fm. | HF/HNO <sub>3</sub> /HClO <sub>4</sub> | 0.61 | 0.72 | 0.72 | 0.48 | 21.9  | 7.07 | Tian et al., 2017      |
| TJDST-34  | Muddy dolostone | Yangtze            | Mb-II, Doushantuo Fm. | HF/HNO <sub>3</sub> /HClO <sub>4</sub> | 0.61 | 0.64 | 0.35 | 0.26 | 35.94 | 6.34 | Tian et al., 2017      |
| TJDST-31  | Muddy dolostone | Yangtze            | Mb-II, Doushantuo Fm. | HF/HNO <sub>3</sub> /HClO <sub>4</sub> | 0.61 | 0.42 | 0.24 | 0.26 | 23.59 | 4.35 | Tian et al., 2017      |
| TJDST-28  | Muddy dolostone | Yangtze            | Mb-II, Doushantuo Fm. | HF/HNO <sub>3</sub> /HClO <sub>4</sub> | 0.61 | 0.67 | 0.35 | 0.5  | 19.56 | 3.3  | Tian et al., 2017      |
| TJDST-16  | Muddy dolostone | Yangtze            | Mb-II, Doushantuo Fm. | HF/HNO <sub>3</sub> /HClO <sub>4</sub> | 0.61 | 0.14 | 0.2  | 0.1  | 20.44 | 9.42 | Tian et al., 2017      |
| TJDST-13  | Muddy dolostone | Yangtze            | Mb-II, Doushantuo Fm. | HF/HNO <sub>3</sub> /HClO <sub>4</sub> | 0.61 | 0.13 | 0.12 | 0.5  | 3.796 | 1.13 | Tian et al., 2017      |
| TJDST-6   | Muddy dolostone | Yangtze            | Mb-I, Doushantuo Fm.  | HF/HNO <sub>3</sub> /HClO <sub>4</sub> | 0.64 | 0.07 | 0.18 | 0.46 | 2.222 | 1.84 | Tian et al., 2017      |
| AQ-L1-1   | Cement          | Southern Australia | Balcanoona Fm.        | -                                      | 0.65 | 0.02 | 0.48 | 0.01 | 37.06 | 388  | Hood and Wallace, 2015 |
| AQ-L1-4   | Cement          | Southern Australia | Balcanoona Fm.        | -                                      | 0.65 | 0.02 | 0.24 | 0    | 576.9 | 2768 | Hood and Wallace, 2015 |
| Z10-L7-4  | Cement          | Southern Australia | Balcanoona Fm.        | -                                      | 0.65 | 0.05 | 0.22 | 0    | 1123  | 1489 | Hood and Wallace, 2015 |
| Z10-L7-5  | Cement          | Southern Australia | Balcanoona Fm.        | -                                      | 0.65 | 0.02 | 0.16 | 0    | 52.47 | 186  | Hood and Wallace, 2015 |
| Z10-L7-6  | Cement          | Southern Australia | Balcanoona Fm.        | -                                      | 0.65 | 0.01 | 0.06 | 0    | 32.53 | 72   | Hood and Wallace, 2015 |
| Z10-L8-2  | Cement          | Southern Australia | Balcanoona Fm.        | -                                      | 0.65 | 0.06 | 0.33 | 0    | 353.8 | 622  | Hood and Wallace, 2015 |
| Z10-L8-3  | Cement          | Southern Australia | Balcanoona Fm.        | -                                      | 0.65 | 0.03 | 0.31 | 0    | 3280  | 9608 | Hood and Wallace, 2015 |
| Z10-L8-4  | Cement          | Southern Australia | Balcanoona Fm.        | -                                      | 0.65 | 0.02 | 0.21 | N.D. | N.D.  | N.D. | Hood and Wallace, 2015 |
| Z10-L8-5  | Cement          | Southern Australia | Balcanoona Fm.        | -                                      | 0.65 | 0    | 0.01 | N.D. | N.D.  | N.D. | Hood and Wallace, 2015 |
| Z10-L8-6  | Cement          | Southern Australia | Balcanoona Fm.        | -                                      | 0.65 | 0    | 0.01 | N.D. | N.D.  | N.D. | Hood and Wallace, 2015 |
| Z2_4      | Cement          | Southern Australia | Balcanoona Fm.        | -                                      | 0.65 | 0.03 | 0.25 | 0.01 | 75.92 | 231  | Hood and Wallace, 2015 |
| Z4_1      | Cement          | Southern Australia | Balcanoona Fm.        | -                                      | 0.65 | 0.02 | 0.22 | 0    | 167.8 | 646  | Hood and Wallace, 2015 |

|           |        |                    |                |   |      |      |      |      |       |      |                        |
|-----------|--------|--------------------|----------------|---|------|------|------|------|-------|------|------------------------|
| Z4_10     | Cement | Southern Australia | Balcanoona Fm. | - | 0.65 | 0.08 | 0.44 | 0    | 1423  | 2617 | Hood and Wallace, 2015 |
| Z4_2      | Cement | Southern Australia | Balcanoona Fm. | - | 0.65 | 0.04 | 1.08 | 0    | 3718  | #### | Hood and Wallace, 2015 |
| Z4_3      | Cement | Southern Australia | Balcanoona Fm. | - | 0.65 | 0.03 | 2.37 | 0    | 223.1 | 6342 | Hood and Wallace, 2015 |
| Z4_4      | Cement | Southern Australia | Balcanoona Fm. | - | 0.65 | 0.07 | 0.22 | 0    | 646.8 | 645  | Hood and Wallace, 2015 |
| Z4_5      | Cement | Southern Australia | Balcanoona Fm. | - | 0.65 | 0.2  | 1.35 | N.D. | N.D.  | N.D. | Hood and Wallace, 2015 |
| Z4_9      | Cement | Southern Australia | Balcanoona Fm. | - | 0.65 | 0.04 | 0.24 | 0    | 533.3 | 921  | Hood and Wallace, 2015 |
| Z4-L11-1  | Cement | Southern Australia | Balcanoona Fm. | - | 0.65 | 0.03 | 0.84 | 0.01 | 86.32 | 694  | Hood and Wallace, 2015 |
| Z4-L11-5  | Cement | Southern Australia | Balcanoona Fm. | - | 0.65 | 0.04 | 0.28 | #### | 7655  | #### | Hood and Wallace, 2015 |
| Z4-L11-6  | Cement | Southern Australia | Balcanoona Fm. | - | 0.65 | 0.04 | 0.22 | 0    | 5256  | #### | Hood and Wallace, 2015 |
| Z4-L11-7  | Cement | Southern Australia | Balcanoona Fm. | - | 0.65 | 0.05 | 0.23 | 0    | 2087  | 2924 | Hood and Wallace, 2015 |
| Q-L2-1    | Cement | Southern Australia | Balcanoona Fm. | - | 0.65 | 0.01 | 0.54 | 0.01 | 14.43 | 293  | Hood and Wallace, 2015 |
| Q-L2-3    | Cement | Southern Australia | Balcanoona Fm. | - | 0.65 | 0.04 | 1.54 | 0.01 | 63.59 | 806  | Hood and Wallace, 2015 |
| U2-L6-1   | Cement | Southern Australia | Balcanoona Fm. | - | 0.65 | 0.01 | 0.06 | 0    | 130.9 | 459  | Hood and Wallace, 2015 |
| U2-L6-2   | Cement | Southern Australia | Balcanoona Fm. | - | 0.65 | 0.01 | 0.06 | 0    | 25.22 | 92.5 | Hood and Wallace, 2015 |
| U2-L6-3   | Cement | Southern Australia | Balcanoona Fm. | - | 0.65 | 0.01 | 0.07 | 0    | 123.3 | 378  | Hood and Wallace, 2015 |
| U2-L6-4   | Cement | Southern Australia | Balcanoona Fm. | - | 0.65 | 0.01 | 0.05 | 0.01 | 32.11 | 53.2 | Hood and Wallace, 2015 |
| U2-L6-5   | Cement | Southern Australia | Balcanoona Fm. | - | 0.65 | 0    | 0.02 | 0.01 | 11.39 | 19.3 | Hood and Wallace, 2015 |
| U2-L6-6   | Cement | Southern Australia | Balcanoona Fm. | - | 0.65 | 0    | 0.02 | 0    | 14.96 | 30.7 | Hood and Wallace, 2015 |
| U4_3      | Cement | Southern Australia | Balcanoona Fm. | - | 0.65 | N.D. | 0.1  | 0    |       | 686  | Hood and Wallace, 2015 |
| U4_4      | Cement | Southern Australia | Balcanoona Fm. | - | 0.65 | 0    | 0.03 | 0.01 | 4.132 | 22   | Hood and Wallace, 2015 |
| U4_5      | Cement | Southern Australia | Balcanoona Fm. | - | 0.65 | 0.01 | 0.03 | 0.01 | 33.15 | 25.9 | Hood and Wallace, 2015 |
| U4_6      | Cement | Southern Australia | Balcanoona Fm. | - | 0.65 | 0    | 0.01 | 0    | 7.834 | 14.6 | Hood and Wallace, 2015 |
| U5-L10-2  | Cement | Southern Australia | Balcanoona Fm. | - | 0.65 | 0    | 0.07 | 0    | 6.779 | 102  | Hood and Wallace, 2015 |
| U5-L10-3  | Cement | Southern Australia | Balcanoona Fm. | - | 0.65 | 0.01 | 0.35 | 0.01 | 14.79 | 304  | Hood and Wallace, 2015 |
| U5-L10-4  | Cement | Southern Australia | Balcanoona Fm. | - | 0.65 | 0.02 | 0.11 | 0.01 | 40.53 | 79.8 | Hood and Wallace, 2015 |
| U5-L10-5  | Cement | Southern Australia | Balcanoona Fm. | - | 0.65 | 0    | 0.56 | 0    | 31.94 | 1648 | Hood and Wallace, 2015 |
| U5-L10-6  | Cement | Southern Australia | Balcanoona Fm. | - | 0.65 | 0    | 0.08 | 0    | 50.25 | 911  | Hood and Wallace, 2015 |
| U5-L10-7  | Cement | Southern Australia | Balcanoona Fm. | - | 0.65 | 0    | 0.04 | 0    | 22.52 | 105  | Hood and Wallace, 2015 |
| U5-L10-8  | Cement | Southern Australia | Balcanoona Fm. | - | 0.65 | 0.01 | 0.05 | 0.01 | 15.77 | 39.1 | Hood and Wallace, 2015 |
| U5-L10-9  | Cement | Southern Australia | Balcanoona Fm. | - | 0.65 | 0.01 | 0.04 | 0    | 18.6  | 53.9 | Hood and Wallace, 2015 |
| KMC_1     | Cement | Southern Australia | Balcanoona Fm. | - | 0.65 | 0    | 0.11 | 0.01 | 4.816 | 52.2 | Hood and Wallace, 2015 |
| KMC_3     | Cement | Southern Australia | Balcanoona Fm. | - | 0.65 | 0.07 | 0.11 | 0.01 | 109.1 | 58.3 | Hood and Wallace, 2015 |
| KMC2-L9-2 | Cement | Southern Australia | Balcanoona Fm. | - | 0.65 | 0    | 0.16 | 0.01 | 2.409 | 94.8 | Hood and Wallace, 2015 |

|           |              |                          |                      |   |      |      |      |      |       |      |                        |
|-----------|--------------|--------------------------|----------------------|---|------|------|------|------|-------|------|------------------------|
| KMC2-L9-3 | Cement       | Southern Australia       | Balcanoona Fm.       | - | 0.65 | 0    | 0.16 | 0.01 | 6.235 | 131  | Hood and Wallace, 2015 |
| KMC2-L9-4 | Cement       | Southern Australia       | Balcanoona Fm.       | - | 0.65 | 0    | 0.11 | 0.01 | 11.14 | 105  | Hood and Wallace, 2015 |
| KMC2-L9-5 | Cement       | Southern Australia       | Balcanoona Fm.       | - | 0.65 | 0    | 0.22 | 0.01 | 12.63 | 229  | Hood and Wallace, 2015 |
| U3-L5-2   | Cement       | Southern Australia       | Balcanoona Fm.       | - | 0.65 | 0.07 | 0.18 | 0.01 | 172   | 143  | Hood and Wallace, 2015 |
| U3-L5-5   | Cement       | Southern Australia       | Balcanoona Fm.       | - | 0.65 | 0.09 | 0.16 | 0.01 | 175.8 | 104  | Hood and Wallace, 2015 |
| U3-L5-6   | Cement       | Southern Australia       | Balcanoona Fm.       | - | 0.65 | 0.04 | 0.11 | 0.01 | 62.85 | 63.8 | Hood and Wallace, 2015 |
| U3-L5-7   | Cement       | Southern Australia       | Balcanoona Fm.       | - | 0.65 | 0.09 | 0.14 | 0.01 | 167.2 | 84.4 | Hood and Wallace, 2015 |
| U3-L5-8   | Cement       | Southern Australia       | Balcanoona Fm.       | - | 0.65 | 0.01 | 0.13 | 0    | 49.4  | 150  | Hood and Wallace, 2015 |
| U3-L5a-3  | Cement       | Southern Australia       | Balcanoona Fm.       | - | 0.65 | 0.1  | 0.19 | 0.01 | 143.7 | 92.2 | Hood and Wallace, 2015 |
| U3-L5a-5  | Cement       | Southern Australia       | Balcanoona Fm.       | - | 0.65 | 0.13 | 0.1  | 0    | 572.3 | 142  | Hood and Wallace, 2015 |
| AQ-M3-6   | Micrite      | Southern Australia       | Balcanoona Fm.       | - | 0.65 | 0.03 | 0.14 | 0.17 | 2.444 | 3.88 | Hood and Wallace, 2015 |
| U3-M1-4   | Micrite      | Southern Australia       | Balcanoona Fm.       | - | 0.65 | 0.03 | 0.22 | 0.27 | 1.767 | 3.93 | Hood and Wallace, 2015 |
| U3-M1-5   | Micrite      | Southern Australia       | Balcanoona Fm.       | - | 0.65 | 0.03 | 0.18 | 0.23 | 1.595 | 3.71 | Hood and Wallace, 2015 |
| U3-M1-6   | Micrite      | Southern Australia       | Balcanoona Fm.       | - | 0.65 | 0.03 | 0.16 | 0.22 | 1.719 | 3.39 | Hood and Wallace, 2015 |
| AQ-M3-1   | Microbialite | Southern Australia       | Balcanoona Fm.       | - | 0.65 | 0.03 | 0.23 | 0.1  | 4.709 | 10.7 | Hood and Wallace, 2015 |
| AQ-M3-2   | Microbialite | Southern Australia       | Balcanoona Fm.       | - | 0.65 | 0.03 | 0.21 | 0.1  | 3.703 | 10   | Hood and Wallace, 2015 |
| AQ-M3-3   | Microbialite | Southern Australia       | Balcanoona Fm.       | - | 0.65 | 0.01 | 0.2  | 0.1  | 1.733 | 9.81 | Hood and Wallace, 2015 |
| AQ-M3-4   | Microbialite | Southern Australia       | Balcanoona Fm.       | - | 0.65 | 0.02 | 0.2  | 0.11 | 3.349 | 8.81 | Hood and Wallace, 2015 |
| AQ-M3-5   | Microbialite | Southern Australia       | Balcanoona Fm.       | - | 0.65 | 0.01 | 0.22 | 0.1  | 2.008 | 10.2 | Hood and Wallace, 2015 |
| AQ-M3-7   | Microbialite | Southern Australia       | Balcanoona Fm.       | - | 0.65 | 0.02 | 0.23 | 0.1  | 2.315 | 10.7 | Hood and Wallace, 2015 |
| Z10-M8-1  | Microbialite | Southern Australia       | Balcanoona Fm.       | - | 0.65 | 0.01 | 0.1  | 0.02 | 9.733 | 31.9 | Hood and Wallace, 2015 |
| Z10-M8-2  | Microbialite | Southern Australia       | Balcanoona Fm.       | - | 0.65 | 0.06 | 0.34 | 0.28 | 3.014 | 5.79 | Hood and Wallace, 2015 |
| Z10-M8-3  | Microbialite | Southern Australia       | Balcanoona Fm.       | - | 0.65 | 0.04 | 0.23 | 0.03 | 18.87 | 35.1 | Hood and Wallace, 2015 |
| U3-M2-1   | Microbialite | Southern Australia       | Balcanoona Fm.       | - | 0.65 | 0.02 | 0.18 | 0.44 | 0.748 | 1.91 | Hood and Wallace, 2015 |
| U3-M2-3   | Microbialite | Southern Australia       | Balcanoona Fm.       | - | 0.65 | 0.03 | 0.17 | 0.28 | 1.799 | 2.9  | Hood and Wallace, 2015 |
| U3-M2-4   | Microbialite | Southern Australia       | Balcanoona Fm.       | - | 0.65 | 0.02 | 0.1  | 0.09 | 3.218 | 5.64 | Hood and Wallace, 2015 |
| U3-M2-4   | Microbialite | Southern Australia       | Balcanoona Fm.       | - | 0.65 | 0.03 | 0.13 | 0.18 | 2.08  | 3.49 | Hood and Wallace, 2015 |
| KMC2-M6-1 | Microbialite | Southern Australia       | Balcanoona Fm.       | - | 0.65 | 0.05 | 0.24 | 0.31 | 2.319 | 3.67 | Hood and Wallace, 2015 |
| KMC2-M6-2 | Microbialite | Southern Australia       | Balcanoona Fm.       | - | 0.65 | 0.05 | 0.23 | 0.3  | 2.606 | 3.65 | Hood and Wallace, 2015 |
| KMC2-M6-3 | Microbialite | Southern Australia       | Balcanoona Fm.       | - | 0.65 | 0.06 | 0.25 | 0.33 | 2.754 | 3.55 | Hood and Wallace, 2015 |
| KMC2-M6-4 | Microbialite | Southern Australia       | Balcanoona Fm.       | - | 0.65 | 0.05 | 0.28 | 0.32 | 2.507 | 4.22 | Hood and Wallace, 2015 |
| KMC2-M6-5 | Microbialite | Southern Australia       | Balcanoona Fm.       | - | 0.65 | 0.05 | 0.17 | 0.2  | 3.756 | 4.03 | Hood and Wallace, 2015 |
| Mc        | Dolostone    | Death Valley region, USA | Beck Spring Dolomite | - | 0.74 | N.D. | 0.09 | 0.04 | N.D.  | 10.5 | Shuster et al., 2018   |

|           |           |                          |                      |   |      |      |      |      |      |      |                      |
|-----------|-----------|--------------------------|----------------------|---|------|------|------|------|------|------|----------------------|
| EMR-1 C   | Dolostone | Death Valley region, USA | Beck Spring Dolomite | - | 0.74 | N.D. | 0.21 | 0    | N.D. | 497  | Shuster et al., 2018 |
| EMR-1 C_1 | Dolostone | Death Valley region, USA | Beck Spring Dolomite | - | 0.74 | N.D. | 0.13 | 0.01 | N.D. | 63.1 | Shuster et al., 2018 |
| EMR-1 C_2 | Dolostone | Death Valley region, USA | Beck Spring Dolomite | - | 0.74 | N.D. | 0.12 | 0.01 | N.D. | 48.7 | Shuster et al., 2018 |
| EMR-1 C_3 | Dolostone | Death Valley region, USA | Beck Spring Dolomite | - | 0.74 | N.D. | 0.1  | 0.01 | N.D. | 59.5 | Shuster et al., 2018 |
| EMR-1 C_4 | Dolostone | Death Valley region, USA | Beck Spring Dolomite | - | 0.74 | N.D. | 0.12 | 0.01 | N.D. | 56   | Shuster et al., 2018 |
| EMR-1 A_2 | Dolostone | Death Valley region, USA | Beck Spring Dolomite | - | 0.74 | N.D. | 0.13 | 0.01 | N.D. | 77.1 | Shuster et al., 2018 |
| EMR-1 A_3 | Dolostone | Death Valley region, USA | Beck Spring Dolomite | - | 0.74 | N.D. | 0.2  | 0    | N.D. | 311  | Shuster et al., 2018 |
| EMR-1 A_4 | Dolostone | Death Valley region, USA | Beck Spring Dolomite | - | 0.74 | N.D. | 0.09 | 0    | N.D. | 217  | Shuster et al., 2018 |
| EMR-1 A_5 | Dolostone | Death Valley region, USA | Beck Spring Dolomite | - | 0.74 | N.D. | 0.13 | 0    | N.D. | 150  | Shuster et al., 2018 |
| EMR-1 A_6 | Dolostone | Death Valley region, USA | Beck Spring Dolomite | - | 0.74 | N.D. | 0.41 | 0.01 | N.D. | 274  | Shuster et al., 2018 |
| EMR-1 B_2 | Dolostone | Death Valley region, USA | Beck Spring Dolomite | - | 0.74 | N.D. | 0.09 | 0.01 | N.D. | 41.4 | Shuster et al., 2018 |
| EMR-1 B_3 | Dolostone | Death Valley region, USA | Beck Spring Dolomite | - | 0.74 | N.D. | 0.08 | 0    | N.D. | 118  | Shuster et al., 2018 |
| EMR-1 B_4 | Dolostone | Death Valley region, USA | Beck Spring Dolomite | - | 0.74 | N.D. | 0.06 | N.D. | N.D. | N.D. | Shuster et al., 2018 |
| EMR-1 B_5 | Dolostone | Death Valley region, USA | Beck Spring Dolomite | - | 0.74 | N.D. | 0.42 | N.D. | N.D. | N.D. | Shuster et al., 2018 |
| EMR-1 B_6 | Dolostone | Death Valley region, USA | Beck Spring Dolomite | - | 0.74 | N.D. | 0.2  | 0.01 | N.D. | 137  | Shuster et al., 2018 |
| EMR-1_3   | Dolostone | Death Valley region, USA | Beck Spring Dolomite | - | 0.74 | N.D. | 0.11 | 0.01 | N.D. | 50.9 | Shuster et al., 2018 |
| EMR-1_4   | Dolostone | Death Valley region, USA | Beck Spring Dolomite | - | 0.74 | N.D. | 0.13 | 0.01 | N.D. | 62.6 | Shuster et al., 2018 |
| EMR-1_5   | Dolostone | Death Valley region, USA | Beck Spring Dolomite | - | 0.74 | N.D. | 0.06 | 0    | N.D. | 146  | Shuster et al., 2018 |
| EMR-1_6   | Dolostone | Death Valley region, USA | Beck Spring Dolomite | - | 0.74 | N.D. | 0.08 | 0    | N.D. | 127  | Shuster et al., 2018 |
| EMR-1_7   | Dolostone | Death Valley region, USA | Beck Spring Dolomite | - | 0.74 | N.D. | 0.1  | N.D. | N.D. | N.D. | Shuster et al., 2018 |
| EMR-1_8   | Dolostone | Death Valley region, USA | Beck Spring Dolomite | - | 0.74 | N.D. | 0.29 | 0.03 | N.D. | 50.9 | Shuster et al., 2018 |
| Mc_1      | Dolostone | Death Valley region, USA | Beck Spring Dolomite | - | 0.74 | N.D. | 0.99 | 0    | N.D. | 2338 | Shuster et al., 2018 |
| Mc_4      | Dolostone | Death Valley region, USA | Beck Spring Dolomite | - | 0.74 | N.D. | 0.04 | 0.01 | N.D. | 29.6 | Shuster et al., 2018 |
| EMR-1_1c  | Dolostone | Death Valley region, USA | Beck Spring Dolomite | - | 0.74 | N.D. | 0.24 | 0.01 | N.D. | 113  | Shuster et al., 2018 |
| EMR-1_2c  | Dolostone | Death Valley region, USA | Beck Spring Dolomite | - | 0.74 | N.D. | 0.21 | 0.01 | N.D. | 141  | Shuster et al., 2018 |
| EMR-1_3c  | Dolostone | Death Valley region, USA | Beck Spring Dolomite | - | 0.74 | N.D. | 0.11 | 0    | N.D. | 170  | Shuster et al., 2018 |
| EMR-1_4c  | Dolostone | Death Valley region, USA | Beck Spring Dolomite | - | 0.74 | N.D. | 0.15 | 0.01 | N.D. | 102  | Shuster et al., 2018 |
| EMR-1_5c  | Dolostone | Death Valley region, USA | Beck Spring Dolomite | - | 0.74 | N.D. | 0.09 | 0.01 | N.D. | 73   | Shuster et al., 2018 |
| EMR-1A_1m | Dolostone | Death Valley region, USA | Beck Spring Dolomite | - | 0.74 | N.D. | 0.32 | 0.39 | N.D. | 3.79 | Shuster et al., 2018 |
| EMR-1A_2m | Dolostone | Death Valley region, USA | Beck Spring Dolomite | - | 0.74 | N.D. | 0.17 | 0.11 | N.D. | 7.17 | Shuster et al., 2018 |
| EMR-1A_3c | Dolostone | Death Valley region, USA | Beck Spring Dolomite | - | 0.74 | N.D. | 0.23 | 0.01 | N.D. | 184  | Shuster et al., 2018 |
| EMR-1A_4c | Dolostone | Death Valley region, USA | Beck Spring Dolomite | - | 0.74 | N.D. | 0.1  | 0    | N.D. | 155  | Shuster et al., 2018 |
| EMR-1A_5c | Dolostone | Death Valley region, USA | Beck Spring Dolomite | - | 0.74 | N.D. | 0.07 | 0    | N.D. | 344  | Shuster et al., 2018 |

|           |           |                          |                      |   |      |      |      |      |      |      |                      |
|-----------|-----------|--------------------------|----------------------|---|------|------|------|------|------|------|----------------------|
| EMR-1A_6c | Dolostone | Death Valley region, USA | Beck Spring Dolomite | - | 0.74 | N.D. | 0.07 | 0    | N.D. | 167  | Shuster et al., 2018 |
| EMR-1A_7c | Dolostone | Death Valley region, USA | Beck Spring Dolomite | - | 0.74 | N.D. | 0.5  | 0    | N.D. | 1175 | Shuster et al., 2018 |
| EMR-1A_8c | Dolostone | Death Valley region, USA | Beck Spring Dolomite | - | 0.74 | N.D. | 0.06 | N.D. | N.D. | N.D. | Shuster et al., 2018 |
| SS_3_1    | Dolostone | Death Valley region, USA | Beck Spring Dolomite | - | 0.74 | N.D. | 0.27 | N.D. | N.D. | N.D. | Shuster et al., 2018 |
| SS_3_2    | Dolostone | Death Valley region, USA | Beck Spring Dolomite | - | 0.74 | N.D. | 0.61 | N.D. | N.D. | N.D. | Shuster et al., 2018 |
| SS_3_3    | Dolostone | Death Valley region, USA | Beck Spring Dolomite | - | 0.74 | N.D. | 0.38 | N.D. | N.D. | N.D. | Shuster et al., 2018 |
| SS_3_4    | Dolostone | Death Valley region, USA | Beck Spring Dolomite | - | 0.74 | N.D. | 0.33 | N.D. | N.D. | N.D. | Shuster et al., 2018 |
| SS_3_5    | Dolostone | Death Valley region, USA | Beck Spring Dolomite | - | 0.74 | N.D. | 1.01 | N.D. | N.D. | N.D. | Shuster et al., 2018 |
| SS_3_6    | Dolostone | Death Valley region, USA | Beck Spring Dolomite | - | 0.74 | N.D. | 0.16 | N.D. | N.D. | N.D. | Shuster et al., 2018 |
| SS_3_7    | Dolostone | Death Valley region, USA | Beck Spring Dolomite | - | 0.74 | N.D. | 0.2  | 0.06 | N.D. | 15.1 | Shuster et al., 2018 |
| SS_3_8    | Dolostone | Death Valley region, USA | Beck Spring Dolomite | - | 0.74 | N.D. | 0.26 | N.D. | N.D. | N.D. | Shuster et al., 2018 |
| SS_3_9    | Dolostone | Death Valley region, USA | Beck Spring Dolomite | - | 0.74 | N.D. | 0.26 | N.D. | N.D. | N.D. | Shuster et al., 2018 |
| SS_3_10   | Dolostone | Death Valley region, USA | Beck Spring Dolomite | - | 0.74 | N.D. | 0.39 | N.D. | N.D. | N.D. | Shuster et al., 2018 |
| SW_1_1    | Dolostone | Death Valley region, USA | Beck Spring Dolomite | - | 0.74 | N.D. | 0.11 | N.D. | N.D. | N.D. | Shuster et al., 2018 |
| SW_1_2    | Dolostone | Death Valley region, USA | Beck Spring Dolomite | - | 0.74 | N.D. | 0.21 | 0.17 | N.D. | 5.71 | Shuster et al., 2018 |
| SW_1_3    | Dolostone | Death Valley region, USA | Beck Spring Dolomite | - | 0.74 | N.D. | 0.06 | N.D. | N.D. | N.D. | Shuster et al., 2018 |
| SW_1_4    | Dolostone | Death Valley region, USA | Beck Spring Dolomite | - | 0.74 | N.D. | 0.23 | 0.17 | N.D. | 6.35 | Shuster et al., 2018 |
| SW_1_5    | Dolostone | Death Valley region, USA | Beck Spring Dolomite | - | 0.74 | N.D. | 0.07 | N.D. | N.D. | N.D. | Shuster et al., 2018 |
| SW_1_6    | Dolostone | Death Valley region, USA | Beck Spring Dolomite | - | 0.74 | N.D. | 0.09 | N.D. | N.D. | N.D. | Shuster et al., 2018 |
| SW_1_7    | Dolostone | Death Valley region, USA | Beck Spring Dolomite | - | 0.74 | N.D. | 0.13 | N.D. | N.D. | N.D. | Shuster et al., 2018 |
| SW_1_8    | Dolostone | Death Valley region, USA | Beck Spring Dolomite | - | 0.74 | N.D. | 0.06 | N.D. | N.D. | N.D. | Shuster et al., 2018 |
| SW_1_9    | Dolostone | Death Valley region, USA | Beck Spring Dolomite | - | 0.74 | N.D. | 1.29 | 0.16 | N.D. | 39.1 | Shuster et al., 2018 |
| SW_1_10   | Dolostone | Death Valley region, USA | Beck Spring Dolomite | - | 0.74 | N.D. |      | N.D. | N.D. | N.D. | Shuster et al., 2018 |
| AH_2_1    | Dolostone | Death Valley region, USA | Beck Spring Dolomite | - | 0.74 | N.D. | 0.83 | 0.16 | N.D. | 24.7 | Shuster et al., 2018 |
| AH_2_2    | Dolostone | Death Valley region, USA | Beck Spring Dolomite | - | 0.74 | N.D. | 0.74 | 0.1  | N.D. | 35.1 | Shuster et al., 2018 |
| AH_2_3    | Dolostone | Death Valley region, USA | Beck Spring Dolomite | - | 0.74 | N.D. | 0.73 | N.D. | N.D. | N.D. | Shuster et al., 2018 |
| AH_2_4    | Dolostone | Death Valley region, USA | Beck Spring Dolomite | - | 0.74 | N.D. | 0.72 | N.D. | N.D. | N.D. | Shuster et al., 2018 |
| AH_2_5    | Dolostone | Death Valley region, USA | Beck Spring Dolomite | - | 0.74 | N.D. | 1.07 | 0.15 | N.D. | 34.2 | Shuster et al., 2018 |
| AH_2_6    | Dolostone | Death Valley region, USA | Beck Spring Dolomite | - | 0.74 | N.D. | 0.13 | N.D. | N.D. | N.D. | Shuster et al., 2018 |
| AH_2_7    | Dolostone | Death Valley region, USA | Beck Spring Dolomite | - | 0.74 | N.D. | 0.15 | N.D. | N.D. | N.D. | Shuster et al., 2018 |
| AH_2_8    | Dolostone | Death Valley region, USA | Beck Spring Dolomite | - | 0.74 | N.D. | 0.1  | N.D. | N.D. | N.D. | Shuster et al., 2018 |
| AH_2_9    | Dolostone | Death Valley region, USA | Beck Spring Dolomite | - | 0.74 | N.D. | 0.24 | N.D. | N.D. | N.D. | Shuster et al., 2018 |
| AH_2_10   | Dolostone | Death Valley region, USA | Beck Spring Dolomite | - | 0.74 | N.D. |      | N.D. | N.D. | N.D. | Shuster et al., 2018 |

|           |           |         |              |                  |      |      |      |      |       |      |                  |
|-----------|-----------|---------|--------------|------------------|------|------|------|------|-------|------|------------------|
| SW-77     | Dolostone | Yangtze | Wagangxi Fm  | HNO <sub>3</sub> | 1.12 | 0.02 | 0.28 | 0.13 | 2.317 | 10.5 | Zou et al., 2019 |
| SW-74     | Dolostone | Yangtze | Wagangxi Fm  | HNO <sub>3</sub> | 1.12 | 0.04 | 0.11 | 0.09 | 6.489 | 5.76 | Zou et al., 2019 |
| SW-72     | Dolostone | Yangtze | Wagangxi Fm  | HNO <sub>3</sub> | 1.12 | 0.42 | 0.2  | 0.44 | 14.06 | 2.16 | Zou et al., 2019 |
| SW-44     | Dolostone | Yangtze | Wagangxi Fm  | HNO <sub>3</sub> | 1.12 | 0.04 | 0.13 | 0.46 | 1.284 | 1.35 | Zou et al., 2019 |
| SW-31     | Dolostone | Yangtze | Wagangxi Fm  | HNO <sub>3</sub> | 1.12 | 0.02 | 0.14 | 0.38 | 0.775 | 1.75 | Zou et al., 2019 |
| GS-1062-4 | Dolostone | Yangtze | Shicaohe Fm  | HNO <sub>3</sub> | 1.18 | 0.62 | 0.16 | 0.29 | 31.65 | 2.64 | Zou et al., 2019 |
| GS-1051   | Dolostone | Yangtze | Shicaohe Fm  | HNO <sub>3</sub> | 1.18 | 2.1  | 0.12 | 0.34 | 89.65 | 1.65 | Zou et al., 2019 |
| TW-305    | Dolostone | Yangtze | Wenshuihe Fm | HNO <sub>3</sub> | 1.19 | 0.02 | 0.09 | 0.29 | 1.021 | 1.48 | Zou et al., 2019 |
| TW-286    | Dolostone | Yangtze | Wenshuihe Fm | HNO <sub>3</sub> | 1.19 | 0.01 | 0.32 | 0.1  | 1.475 | 15.2 | Zou et al., 2019 |
| TW-272    | Dolostone | Yangtze | Wenshuihe Fm | HNO <sub>3</sub> | 1.19 | 0.01 | 0.12 | 0.02 | 7.3   | 28.3 | Zou et al., 2019 |
| TW-233    | Dolostone | Yangtze | Wenshuihe Fm | HNO <sub>3</sub> | 1.19 | N.D. | 0.07 | 0.41 | N.D.  | 0.8  | Zou et al., 2019 |
| TW-197    | Dolostone | Yangtze | Wenshuihe Fm | HNO <sub>3</sub> | 1.19 | 0.02 | 0.18 | 0.01 | 32.44 | 94.2 | Zou et al., 2019 |
| TW-193    | Dolostone | Yangtze | Wenshuihe Fm | HNO <sub>3</sub> | 1.19 | 0.32 | 0.14 | 0.42 | 11.2  | 1.58 | Zou et al., 2019 |
| TW-189    | Dolostone | Yangtze | Wenshuihe Fm | HNO <sub>3</sub> | 1.19 | 0.01 | 0.03 | 0.44 | 0.33  | 0.32 | Zou et al., 2019 |
| TY-186    | Dolostone | Yangtze | Yemahe Fm    | HNO <sub>3</sub> | 1.2  | 0.01 | 0.19 | 0.01 | 11.23 | 68.8 | Zou et al., 2019 |
| TY-180    | Dolostone | Yangtze | Yemahe Fm    | HNO <sub>3</sub> | 1.2  | 0.07 | 0.18 | 0.01 | 73    | 60.6 | Zou et al., 2019 |
| TY-173    | Dolostone | Yangtze | Yemahe Fm    | HNO <sub>3</sub> | 1.2  | 0.7  | 0.17 | 0.04 | 268.9 | 21.1 | Zou et al., 2019 |
| TY-169    | Dolostone | Yangtze | Yemahe Fm    | HNO <sub>3</sub> | 1.2  | 0.19 | 0.26 | 0.04 | 64.51 | 28.5 | Zou et al., 2019 |
| TY-156    | Dolostone | Yangtze | Yemahe Fm    | HNO <sub>3</sub> | 1.2  | N.D. | 0.16 | 0.13 | N.D.  | 5.75 | Zou et al., 2019 |
| TY-146    | Dolostone | Yangtze | Yemahe Fm    | HNO <sub>3</sub> | 1.2  | 0.02 | 0.12 | 0.5  | 0.59  | 1.14 | Zou et al., 2019 |
| TY-120    | Dolostone | Yangtze | Yemahe Fm    | HNO <sub>3</sub> | 1.2  | 0.03 | 0.11 | 0.27 | 1.647 | 1.95 | Zou et al., 2019 |
| TY-111    | Dolostone | Yangtze | Yemahe Fm    | HNO <sub>3</sub> | 1.2  | 0.1  | 0.1  | 0.19 | 7.849 | 2.53 | Zou et al., 2019 |
| TY-102    | Dolostone | Yangtze | Yemahe Fm    | HNO <sub>3</sub> | 1.2  | 0.29 | 0.35 | 0.12 | 34.71 | 13.5 | Zou et al., 2019 |
| TY-84     | Dolostone | Yangtze | Yemahe Fm    | HNO <sub>3</sub> | 1.2  | 0.03 | 0.35 | 0.09 | 4.867 | 18.3 | Zou et al., 2019 |
| TY-68     | Dolostone | Yangtze | Yemahe Fm    | HNO <sub>3</sub> | 1.2  | 0.02 | 0.35 | 0.43 | 0.677 | 3.83 | Zou et al., 2019 |
| TY-51     | Dolostone | Yangtze | Yemahe Fm    | HNO <sub>3</sub> | 1.2  | 1.17 | 0.17 | 0    | 4271  | 200  | Zou et al., 2019 |
| TY-40     | Dolostone | Yangtze | Yemahe Fm    | HNO <sub>3</sub> | 1.2  | 0.03 | 0.39 | 0.01 | 33.69 | 141  | Zou et al., 2019 |
| TY-37     | Dolostone | Yangtze | Yemahe Fm    | HNO <sub>3</sub> | 1.2  | 0.03 | 0.32 | 0.01 | 39.82 | 137  | Zou et al., 2019 |
| TT-15     | Dolostone | Yangtze | Taizi Fm     | HNO <sub>3</sub> | 1.22 | 0.06 | 1.31 | 0.04 | 24.33 | 171  | Zou et al., 2019 |
| TT-10     | Dolostone | Yangtze | Taizi Fm     | HNO <sub>3</sub> | 1.22 | 0.1  | 1.37 | 0.03 | 54.07 | 239  | Zou et al., 2019 |



|         |           |             |                          |                     |      |      |      |      |       |      |                   |
|---------|-----------|-------------|--------------------------|---------------------|------|------|------|------|-------|------|-------------------|
| SK-3199 | Dolostone | Yangtze     | Kuangshishan Fm          | HNO <sub>3</sub>    | 1.22 | 0.01 | 0.69 | 0.18 | 0.811 | 18.1 | Zou et al., 2019  |
| SK-3180 | Dolostone | Yangtze     | Kuangshishan Fm          | HNO <sub>3</sub>    | 1.22 | 0.01 | 0.26 | 0.04 | 3.318 | 27.8 | Zou et al., 2019  |
| SK-3163 | Dolostone | Yangtze     | Kuangshishan Fm          | HNO <sub>3</sub>    | 1.22 | 0.01 | 0.56 | 0.07 | 2.116 | 38.2 | Zou et al., 2019  |
| SK-3148 | Dolostone | Yangtze     | Kuangshishan Fm          | HNO <sub>3</sub>    | 1.22 | 0.01 | 0.35 | 0.04 | 3.318 | 37.5 | Zou et al., 2019  |
| SK-3123 | Dolostone | Yangtze     | Kuangshishan Fm          | HNO <sub>3</sub>    | 1.22 | 0.01 | 0.56 | 0.03 | 5.034 | 90.9 | Zou et al., 2019  |
| SD-3049 | Dolostone | Yangtze     | Dawokeng Fm              | HNO <sub>3</sub>    | 1.24 | 0.01 | 0.35 | 0.05 | 3.106 | 35.1 | Zou et al., 2019  |
| SD-3032 | Dolostone | Yangtze     | Dawokeng Fm              | HNO <sub>3</sub>    | 1.24 | 0.02 | 0.31 | 0.41 | 0.717 | 3.59 | Zou et al., 2019  |
| SL-2063 | Dolostone | Yangtze     | Luanshigou Fm            | HNO <sub>3</sub>    | 1.26 | 0.04 | 0.09 | 0.2  | 2.98  | 2.16 | Zou et al., 2019  |
| SL-2013 | Dolostone | Yangtze     | Luanshigou Fm            | HNO <sub>3</sub>    | 1.26 | 0.02 | 0.24 | 0.12 | 2.539 | 9.83 | Zou et al., 2019  |
| SL-1340 | Dolostone | Yangtze     | Luanshigou Fm            | HNO <sub>3</sub>    | 1.26 | 0.04 | 0.15 | 0.48 | 1.214 | 1.47 | Zou et al., 2019  |
| SL-1183 | Dolostone | Yangtze     | Luanshigou Fm            | HNO <sub>3</sub>    | 1.26 | 0.08 | 0.09 | 0.06 | 18.25 | 6.62 | Zou et al., 2019  |
| SL-1154 | Dolostone | Yangtze     | Luanshigou Fm            | HNO <sub>3</sub>    | 1.26 | 0.2  | 0.06 | 0.12 | 24.75 | 2.4  | Zou et al., 2019  |
| SL-1140 | Dolostone | Yangtze     | Luanshigou Fm            | HNO <sub>3</sub>    | 1.26 | 0.35 | 0.05 | 0.17 | 30.24 | 1.39 | Zou et al., 2019  |
| SL-1116 | Dolostone | Yangtze     | Luanshigou Fm            | HNO <sub>3</sub>    | 1.26 | 0.09 | 0.06 | 0.3  | 4.424 | 0.95 | Zou et al., 2019  |
| SL-1088 | Dolostone | Yangtze     | Luanshigou Fm            | HNO <sub>3</sub>    | 1.26 | 0.13 | 0.1  | 0.21 | 9.259 | 2.3  | Zou et al., 2019  |
| SL-1066 | Dolostone | Yangtze     | Luanshigou Fm            | HNO <sub>3</sub>    | 1.26 | 0.15 | 0.05 | 0.18 | 11.97 | 1.29 | Zou et al., 2019  |
| SL-1034 | Dolostone | Yangtze     | Luanshigou Fm            | HNO <sub>3</sub>    | 1.26 | 0.06 | 0.09 | 0.09 | 9.843 | 4.76 | Zou et al., 2019  |
| MD-2099 | Dolostone | Yangtze     | Dayanping Fm             | HNO <sub>3</sub>    | 1.28 | 0.02 | 0.35 | 0.3  | 0.973 | 5.5  | Zou et al., 2019  |
| MY-3104 | Dolostone | Yangtze     | Yingwodong Fm            | HNO <sub>3</sub>    | 1.3  | 0.1  | 3.84 | 0.41 | 3.561 | 44.1 | Zou et al., 2019  |
| MY-3095 | Dolostone | Yangtze     | Yingwodong Fm            | HNO <sub>3</sub>    | 1.3  | 0.01 | 0.21 | 0.03 | 5.84  | 39.6 | Zou et al., 2019  |
| MY-3065 | Dolostone | Yangtze     | Yingwodong Fm            | HNO <sub>3</sub>    | 1.3  | 1.86 | 0.06 | 0.28 | 98.39 | 1.02 | Zou et al., 2019  |
| MY-3055 | Dolostone | Yangtze     | Yingwodong Fm            | HNO <sub>3</sub>    | 1.3  | 0.01 | 0.15 | 0.38 | 0.381 | 1.85 | Zou et al., 2019  |
| MY-3030 | Dolostone | Yangtze     | Yingwodong Fm            | HNO <sub>3</sub>    | 1.3  | 0.25 | 0.17 | 0.14 | 25.52 | 5.6  | Zou et al., 2019  |
| MY-3025 | Dolostone | Yangtze     | Yingwodong Fm            | HNO <sub>3</sub>    | 1.3  | 0.02 | 0.29 | 0.05 | 5.407 | 25.3 | Zou et al., 2019  |
| MY-3017 | Dolostone | Yangtze     | Yingwodong Fm            | HNO <sub>3</sub>    | 1.3  | 0.02 | 0.26 | 0.16 | 1.791 | 7.51 | Zou et al., 2019  |
| 1005-B1 | Dolostone | North China | Member-III, Wumishan Fm. | HF/HNO <sub>3</sub> | 1.46 | 0.07 | 0.07 | 0.02 | 47.78 | 15.4 | Tang et al., 2016 |
| 1005-B4 | Dolostone | North China | Member-III, Wumishan Fm. | HF/HNO <sub>3</sub> | 1.46 | 0.05 | 0.09 | 0.05 | 17.52 | 9.32 | Tang et al., 2016 |
| 1005-B5 | Dolostone | North China | Member-III, Wumishan Fm. | HF/HNO <sub>3</sub> | 1.46 | 0.03 | 0.09 | 0.03 | 13.23 | 13.5 | Tang et al., 2016 |
| 1005-B6 | Dolostone | North China | Member-III, Wumishan Fm. | HF/HNO <sub>3</sub> | 1.46 | 0.08 | 0.57 | 0.07 | 16.86 | 37.5 | Tang et al., 2016 |
| 1005-B7 | Dolostone | North China | Member-III, Wumishan Fm. | HF/HNO <sub>3</sub> | 1.46 | 0.2  | 0.18 | 0.08 | 38.42 | 11   | Tang et al., 2016 |

|              |           |             |                          |                     |      |      |      |      |       |      |                   |
|--------------|-----------|-------------|--------------------------|---------------------|------|------|------|------|-------|------|-------------------|
| 1005-B8      | Dolostone | North China | Member-III, Wumishan Fm. | HF/HNO <sub>3</sub> | 1.46 | 0.06 | 0.12 | 0.03 | 27.79 | 18.1 | Tang et al., 2016 |
| 1009YSP-5    | Dolostone | North China | Member-III, Wumishan Fm. | HF/HNO <sub>3</sub> | 1.46 | 0.03 | 0.08 | 0.04 | 9.847 | 8.76 | Tang et al., 2016 |
| 10ZK-101A-1  | Dolostone | North China | Member-III, Wumishan Fm. | HF/HNO <sub>3</sub> | 1.46 | 0.12 | 0.31 | 0.03 | 54.75 | 44.9 | Tang et al., 2016 |
| 10ZK-103B-1  | Dolostone | North China | Member-III, Wumishan Fm. | HF/HNO <sub>3</sub> | 1.46 | 0.17 | 0.26 | 0.07 | 38.19 | 18.5 | Tang et al., 2016 |
| 10ZK-106A-1  | Dolostone | North China | Member-III, Wumishan Fm. | HF/HNO <sub>3</sub> | 1.46 | 0.13 | 0.16 | 0.04 | 48.91 | 18.5 | Tang et al., 2016 |
| 10ZK-110C-1  | Dolostone | North China | Member-III, Wumishan Fm. | HF/HNO <sub>3</sub> | 1.46 | 0.11 | 0.33 | 0.08 | 20.64 | 20.7 | Tang et al., 2016 |
| 10ZK-114A-1  | Dolostone | North China | Member-III, Wumishan Fm. | HF/HNO <sub>3</sub> | 1.46 | 0.08 | 0.19 | 0.02 | 64.08 | 50.5 | Tang et al., 2016 |
| 10ZK-117A-1  | Dolostone | North China | Member-III, Wumishan Fm. | HF/HNO <sub>3</sub> | 1.46 | 0.1  | 0.33 | 0.02 | 93.08 | 96.5 | Tang et al., 2016 |
| 10ZK-122B-1  | Dolostone | North China | Member-III, Wumishan Fm. | HF/HNO <sub>3</sub> | 1.46 | 0.15 | 0.45 | 0.12 | 19.09 | 18.2 | Tang et al., 2016 |
| 1009YSP-12   | Dolostone | North China | Member-II, Wumishan Fm.  | HF/HNO <sub>3</sub> | 1.48 | 0.05 | 0.25 | 0.04 | 19.84 | 30.7 | Tang et al., 2016 |
| 1009YSP-2(1) | Dolostone | North China | Member-II, Wumishan Fm.  | HF/HNO <sub>3</sub> | 1.48 | 0.01 | 0.07 | 0.04 | 4.867 | 8.77 | Tang et al., 2016 |
| 1009YSP-3    | Dolostone | North China | Member-II, Wumishan Fm.  | HF/HNO <sub>3</sub> | 1.48 | 0.01 | 0.06 | 0.05 | 1.553 | 6.11 | Tang et al., 2016 |
| 10SED-7      | Dolostone | North China | Member-II, Wumishan Fm.  | HF/HNO <sub>3</sub> | 1.48 | 0.02 | 0.1  | 0.05 | 5.256 | 9.8  | Tang et al., 2016 |
| 13YSP-5-1    | Dolostone | North China | Member-II, Wumishan Fm.  | acetic acid         | 1.48 | N.D. | 0.08 | 0.04 | N.D.  | 8.46 | Tang et al., 2016 |
| 13YSP-5-2    | Dolostone | North China | Member-II, Wumishan Fm.  | acetic acid         | 1.48 | N.D. | 0.2  | 0.05 | N.D.  | 18   | Tang et al., 2016 |
| 13YSP-5-3    | Dolostone | North China | Member-II, Wumishan Fm.  | acetic acid         | 1.48 | N.D. | 0.12 | 0.04 | N.D.  | 13.7 | Tang et al., 2016 |
| D02-10-1     | Dolostone | North China | Member-II, Wumishan Fm.  | HF/HNO <sub>3</sub> | 1.48 | 0.07 | 0.1  | 0.08 | 12.05 | 5.65 | Tang et al., 2016 |
| D02-11-1     | Dolostone | North China | Member-II, Wumishan Fm.  | HF/HNO <sub>3</sub> | 1.48 | 0.07 | 0.11 | 0.05 | 21.12 | 10.6 | Tang et al., 2016 |
| D02-14-1     | Dolostone | North China | Member-II, Wumishan Fm.  | HF/HNO <sub>3</sub> | 1.48 | 0.06 | 0.16 | 0.14 | 6.441 | 5.37 | Tang et al., 2016 |
| D02-33a-1    | Dolostone | North China | Member-II, Wumishan Fm.  | HF/HNO <sub>3</sub> | 1.48 | 0.04 | 0.06 | 0.03 | 20.44 | 8.95 | Tang et al., 2016 |
| D02-9-1      | Dolostone | North China | Member-II, Wumishan Fm.  | HF/HNO <sub>3</sub> | 1.48 | 0.09 | 0.21 | 0.1  | 12.72 | 9.56 | Tang et al., 2016 |
| Y-28         | Dolostone | North China | Yangzhuang Fm.           | acetic acid         | 1.5  | 0.23 | 0.23 | 0.62 | 5.489 | 1.75 | this study        |
| Y-27         | Dolostone | North China | Yangzhuang Fm.           | acetic acid         | 1.5  | 0.22 | 0.21 | 0.49 | 6.444 | 2    | this study        |
| Y-24         | Dolostone | North China | Yangzhuang Fm.           | acetic acid         | 1.5  | 0.47 | 0.21 | 0.33 | 20.56 | 3.01 | this study        |
| Y-23         | Dolostone | North China | Yangzhuang Fm.           | acetic acid         | 1.5  | 0.22 | 0.18 | 0.48 | 6.578 | 1.79 | this study        |
| Y-22         | Dolostone | North China | Yangzhuang Fm.           | acetic acid         | 1.5  | 0.26 | 0.21 | 0.34 | 11.24 | 2.94 | this study        |
| Y-21         | Dolostone | North China | Yangzhuang Fm.           | acetic acid         | 1.5  | 0.29 | 0.17 | 0.2  | 21.07 | 4.05 | this study        |
| Y-20         | Dolostone | North China | Yangzhuang Fm.           | acetic acid         | 1.5  | 0.28 | 0.21 | 0.36 | 11.33 | 2.71 | this study        |
| Y-19         | Dolostone | North China | Yangzhuang Fm.           | acetic acid         | 1.5  | 0.64 | 0.18 | 0.35 | 27.02 | 2.38 | this study        |
| Y-18         | Dolostone | North China | Yangzhuang Fm.           | acetic acid         | 1.5  | 0.32 | 0.23 | 0.4  | 12    | 2.75 | this study        |
| Y-17         | Dolostone | North China | Yangzhuang Fm.           | acetic acid         | 1.5  | 0.27 | 0.2  | 0.31 | 12.62 | 2.94 | this study        |

|              |           |             |                            |                     |      |      |      |      |       |      |                   |
|--------------|-----------|-------------|----------------------------|---------------------|------|------|------|------|-------|------|-------------------|
| Y-16         | Dolostone | North China | Yangzhuang Fm.             | acetic acid         | 1.5  | 0.3  | 0.23 | 0.39 | 11.3  | 2.75 | this study        |
| Y-15         | Dolostone | North China | Yangzhuang Fm.             | acetic acid         | 1.5  | 0.28 | 0.21 | 0.49 | 8.348 | 2.04 | this study        |
| Y-14         | Dolostone | North China | Yangzhuang Fm.             | acetic acid         | 1.5  | 0.23 | 0.24 | 0.51 | 6.683 | 2.17 | this study        |
| Y-13         | Dolostone | North China | Yangzhuang Fm.             | acetic acid         | 1.5  | 0.29 | 0.26 | 0.66 | 6.455 | 1.85 | this study        |
| Y-12         | Dolostone | North China | Yangzhuang Fm.             | acetic acid         | 1.5  | 0.3  | 0.32 | 0.63 | 6.871 | 2.37 | this study        |
| Y-11         | Dolostone | North China | Yangzhuang Fm.             | acetic acid         | 1.5  | 0.23 | 0.21 | 0.52 | 6.408 | 1.94 | this study        |
| Y-10         | Dolostone | North China | Yangzhuang Fm.             | acetic acid         | 1.5  | 0.28 | 0.21 | 0.33 | 12.53 | 3    | this study        |
| Y-9          | Dolostone | North China | Yangzhuang Fm.             | acetic acid         | 1.5  | 0.21 | 0.2  | 0.46 | 6.702 | 2.04 | this study        |
| Y-8          | Dolostone | North China | Yangzhuang Fm.             | acetic acid         | 1.5  | 0.3  | 0.19 | 0.7  | 6.169 | 1.26 | this study        |
| Y-7          | Dolostone | North China | Yangzhuang Fm.             | acetic acid         | 1.5  | 0.36 | 0.22 | 0.59 | 8.929 | 1.72 | this study        |
| Y-6          | Dolostone | North China | Yangzhuang Fm.             | acetic acid         | 1.5  | 0.35 | 0.23 | 0.52 | 9.743 | 2.06 | this study        |
| Y-5          | Dolostone | North China | Yangzhuang Fm.             | acetic acid         | 1.5  | 0.26 | 0.21 | 0.49 | 7.75  | 1.97 | this study        |
| Y-4          | Dolostone | North China | Yangzhuang Fm.             | acetic acid         | 1.5  | 0.29 | 0.17 | 0.24 | 17.84 | 3.22 | this study        |
| Y-3          | Dolostone | North China | Yangzhuang Fm.             | acetic acid         | 1.5  | 0.27 | 0.22 | 0.61 | 6.565 | 1.71 | this study        |
| Y-1          | Dolostone | North China | Yangzhuang Fm.             | acetic acid         | 1.5  | 0.25 | 0.18 | 0.5  | 7.403 | 1.71 | this study        |
| DCW11-36     | Dolostone | Yangtze     | The Luzhijiang Fm.         | acetic acid         | 1.5  | 0.02 | 1.71 | 0.24 | 1.502 | 34.3 | Wang et al., 2018 |
| DCW11-37     | Dolostone | Yangtze     | The Luzhijiang Fm.         | acetic acid         | 1.5  | 0    | 1.04 | 0.15 | 0.036 | 32.5 | Wang et al., 2018 |
| DCW11-38     | Dolostone | Yangtze     | The Luzhijiang Fm.         | acetic acid         | 1.5  | 0.02 | 1.01 | 0.32 | 1.077 | 14.8 | Wang et al., 2018 |
| DCW11-39     | Dolostone | Yangtze     | The Luzhijiang Fm.         | acetic acid         | 1.5  | 0.01 | 0.13 | 0.15 | 1.116 | 4.22 | Wang et al., 2018 |
| 10YQ-D05-1-2 | Dolostone | North China | Member-IV, Gaoyuzhuang Fm. | HF/HNO <sub>3</sub> | 1.54 | 2.29 | 0.03 | 0.02 | 1857  | 7.85 | Tang et al., 2016 |
| 10YQ-D05-1-3 | Dolostone | North China | Member-IV, Gaoyuzhuang Fm. | HF/HNO <sub>3</sub> | 1.54 | 0.91 | 0.07 | 0    | 3322  | 76.5 | Tang et al., 2016 |
| 10YQ-D05-1-4 | Dolostone | North China | Member-IV, Gaoyuzhuang Fm. | HF/HNO <sub>3</sub> | 1.54 | 0.03 | 0.01 | 0    | 204.4 | 30.6 | Tang et al., 2016 |
| 10YQ-D07-2-1 | Dolostone | North China | Member-IV, Gaoyuzhuang Fm. | HF/HNO <sub>3</sub> | 1.54 | 0.46 | 0.04 | 0.02 | 451.6 | 12.9 | Tang et al., 2016 |
| 10YQ-D07-2-2 | Dolostone | North China | Member-IV, Gaoyuzhuang Fm. | HF/HNO <sub>3</sub> | 1.54 | 0.15 | 0.1  | 0.09 | 23.68 | 5.08 | Tang et al., 2016 |
| 10YQ-D07-4-1 | Dolostone | North China | Member-IV, Gaoyuzhuang Fm. | HF/HNO <sub>3</sub> | 1.54 | 0.03 | 0.03 | 0.01 | 34.41 | 11.4 | Tang et al., 2016 |
| 10YQ-D07-4-3 | Dolostone | North China | Member-IV, Gaoyuzhuang Fm. | HF/HNO <sub>3</sub> | 1.54 | N.D. | 0.01 | 0    | N.D.  | 10.6 | Tang et al., 2016 |
| 10YQ-D07-4-4 | Dolostone | North China | Member-IV, Gaoyuzhuang Fm. | HF/HNO <sub>3</sub> | 1.54 | 0.06 | 0.03 | 0.01 | 84.68 | 16   | Tang et al., 2016 |
| 10YQ-D07-4-5 | Dolostone | North China | Member-IV, Gaoyuzhuang Fm. | HF/HNO <sub>3</sub> | 1.54 | 0.21 | 0.14 | 0.09 | 34.33 | 7.04 | Tang et al., 2016 |
| No-11        | Dolostone | North China | Member-IV, Gaoyuzhuang Fm. | HF/HNO <sub>3</sub> | 1.54 | 0.14 | 0.06 | 0.19 | 10.76 | 1.49 | Tang et al., 2016 |
| No-13        | Dolostone | North China | Member-IV, Gaoyuzhuang Fm. | HF/HNO <sub>3</sub> | 1.54 | 0.12 | 0.06 | 0.17 | 10.31 | 1.66 | Tang et al., 2016 |
| No-14        | Dolostone | North China | Member-IV, Gaoyuzhuang Fm. | HF/HNO <sub>3</sub> | 1.54 | 0.19 | 0.08 | 0.19 | 14.6  | 1.98 | Tang et al., 2016 |

|              |           |                |                             |                     |      |      |      |      |       |      |                     |
|--------------|-----------|----------------|-----------------------------|---------------------|------|------|------|------|-------|------|---------------------|
| No-2         | Dolostone | North China    | Member-IV, Gaoyuzhuang Fm.  | HF/HNO <sub>3</sub> | 1.54 | 0.16 | 0.04 | 0.01 | 233.6 | 18.8 | Tang et al., 2016   |
| No-4         | Dolostone | North China    | Member-IV, Gaoyuzhuang Fm.  | HF/HNO <sub>3</sub> | 1.54 | 0.42 | 0.39 | 0.01 | 613.2 | 184  | Tang et al., 2016   |
| No-8         | Dolostone | North China    | Member-IV, Gaoyuzhuang Fm.  | HF/HNO <sub>3</sub> | 1.54 | 1.77 | 0.28 | 0.01 | 2584  | 132  | Tang et al., 2016   |
| No-9         | Dolostone | North China    | Member-IV, Gaoyuzhuang Fm.  | HF/HNO <sub>3</sub> | 1.54 | 0.43 | 0.28 | 0.01 | 627.8 | 132  | Tang et al., 2016   |
| 14GG-104.2   | Dolostone | North China    | Member-III, Gaoyuzhuang Fm. | acetic acid         | 1.56 | N.D. | 0.04 | 0.18 | N.D.  | 1.14 | Tang et al., 2016   |
| 14GG-104.7-1 | Dolostone | North China    | Member-III, Gaoyuzhuang Fm. | acetic acid         | 1.56 | 0.05 | 0.15 | 0.35 | 2.052 | 2.04 | Tang et al., 2016   |
| 14GG-105.0-3 | Dolostone | North China    | Member-III, Gaoyuzhuang Fm. | acetic acid         | 1.56 | 0.1  | 0.15 | 0.5  | 3.044 | 1.41 | Tang et al., 2016   |
| 14GG-108.5   | Dolostone | North China    | Member-III, Gaoyuzhuang Fm. | acetic acid         | 1.56 | 0.06 | 0.25 | 0.37 | 2.518 | 3.1  | Tang et al., 2016   |
| 14GG-111.0-1 | Dolostone | North China    | Member-III, Gaoyuzhuang Fm. | acetic acid         | 1.56 | 0.04 | 0.21 | 0.44 | 1.167 | 2.22 | Tang et al., 2016   |
| 14GG-113.4-2 | Dolostone | North China    | Member-III, Gaoyuzhuang Fm. | acetic acid         | 1.56 | 0.18 | 0.12 | 0.42 | 6.266 | 1.29 | Tang et al., 2016   |
| 14GG-117.0   | Dolostone | North China    | Member-III, Gaoyuzhuang Fm. | acetic acid         | 1.56 | 0.28 | 0.3  | 0.41 | 10.14 | 3.53 | Tang et al., 2016   |
| 14GG-119.6   | Dolostone | North China    | Member-III, Gaoyuzhuang Fm. | acetic acid         | 1.56 | 0.09 | 0.11 | 0.1  | 13.92 | 5.42 | Tang et al., 2016   |
| 14GG-94.0-1  | Dolostone | North China    | Member-III, Gaoyuzhuang Fm. | acetic acid         | 1.56 | 0.23 | 0.1  | 0.2  | 17.37 | 2.29 | Tang et al., 2016   |
| 14GG-94.0-2  | Dolostone | North China    | Member-III, Gaoyuzhuang Fm. | acetic acid         | 1.56 | 0.39 | 0.11 | 0.2  | 29.4  | 2.59 | Tang et al., 2016   |
| 14GG-95.6-1  | Dolostone | North China    | Member-III, Gaoyuzhuang Fm. | acetic acid         | 1.56 | N.D. | 0.11 | 0.22 | N.D.  | 2.35 | Tang et al., 2016   |
| 14GG-97.2    | Dolostone | North China    | Member-III, Gaoyuzhuang Fm. | acetic acid         | 1.56 | 0.22 | 0.11 | 0.31 | 10.33 | 1.64 | Tang et al., 2016   |
| DCW11-01     | Dolostone | Yangtze        | The upper Luoxue Fm.        | acetic acid         | 1.6  | 0.01 | 0.35 | 0.3  | 0.418 | 5.5  | Wang et al., 2018   |
| DCW11-02     | Dolostone | Yangtze        | The upper Luoxue Fm.        | acetic acid         | 1.6  | 0.02 | 0.35 | 0.35 | 0.806 | 4.79 | Wang et al., 2018   |
| DCW11-03     | Dolostone | Yangtze        | The upper Luoxue Fm.        | acetic acid         | 1.6  | 0.02 | 0.27 | 0.16 | 1.614 | 8.12 | Wang et al., 2018   |
| DCW11-04     | Dolostone | Yangtze        | The upper Luoxue Fm.        | acetic acid         | 1.6  | 0.02 | 0.16 | 0.41 | 0.697 | 1.78 | Wang et al., 2018   |
| DCW11-06     | Dolostone | Yangtze        | The upper Luoxue Fm.        | acetic acid         | 1.6  | 0.47 | 0.17 | 0.22 | 31.64 | 3.7  | Wang et al., 2018   |
| DCW11-07     | Dolostone | Yangtze        | The upper Luoxue Fm.        | acetic acid         | 1.6  | 0.06 | 0.2  | 0.24 | 3.724 | 3.82 | Wang et al., 2018   |
| DCW11-08     | Dolostone | Yangtze        | The upper Luoxue Fm.        | acetic acid         | 1.6  | 0.03 | 0.23 | 0.19 | 2.123 | 5.78 | Wang et al., 2018   |
| DCW11-56     | Dolostone | Yangtze        | The upper Luoxue Fm.        | acetic acid         | 1.6  | 0.05 | 0.2  | 0.16 | 4.745 | 5.98 | Wang et al., 2018   |
| DCW11-58     | Dolostone | Yangtze        | The upper Luoxue Fm.        | acetic acid         | 1.6  | N.D. | 0.28 | 0.19 | N.D.  | 6.94 | Wang et al., 2018   |
| KH18         | Dolostone | Dharwar Craton | Vempalle I                  | HF/HNO <sub>3</sub> | 1.9  | N.D. | 0.5  | 0.04 | N.D.  | 58.9 | Khelen et al., 2017 |
| KH19         | Dolostone | Dharwar Craton | Vempalle I                  | HF/HNO <sub>3</sub> | 1.9  | N.D. | 0.38 | 0.09 | N.D.  | 20.8 | Khelen et al., 2017 |
| KH20B        | Dolostone | Dharwar Craton | Vempalle I                  | HF/HNO <sub>3</sub> | 1.9  | N.D. | 0.28 | 0.09 | N.D.  | 14.9 | Khelen et al., 2017 |
| KH21B        | Dolostone | Dharwar Craton | Vempalle I                  | HF/HNO <sub>3</sub> | 1.9  | N.D. | 0.58 | 0.14 | N.D.  | 19.5 | Khelen et al., 2017 |
| KH23         | Dolostone | Dharwar Craton | Vempalle I                  | HF/HNO <sub>3</sub> | 1.9  | N.D. | 0.14 | 0.03 | N.D.  | 22   | Khelen et al., 2017 |
| KH24         | Dolostone | Dharwar Craton | Vempalle I                  | HF/HNO <sub>3</sub> | 1.9  | N.D. | 0.32 | 0.12 | N.D.  | 12.6 | Khelen et al., 2017 |
| KH32         | Dolostone | Dharwar Craton | Vempalle II                 | HF/HNO <sub>3</sub> | 1.9  | N.D. | 0.26 | 0.11 | N.D.  | 11.1 | Khelen et al., 2017 |

|       |           |                    |                 |                     |     |      |      |      |       |      |                     |
|-------|-----------|--------------------|-----------------|---------------------|-----|------|------|------|-------|------|---------------------|
| KH33  | Dolostone | Dharwar Craton     | Vempalle II     | HF/HNO <sub>3</sub> | 1.9 | N.D. | 0.33 | 0.18 | N.D.  | 8.63 | Khelen et al., 2017 |
| KH34  | Dolostone | Dharwar Craton     | Vempalle II     | HF/HNO <sub>3</sub> | 1.9 | N.D. | 0.3  | 0.11 | N.D.  | 12.8 | Khelen et al., 2017 |
| KH38  | Dolostone | Dharwar Craton     | Vempalle II     | HF/HNO <sub>3</sub> | 1.9 | N.D. | 0.47 | 0.49 | N.D.  | 4.52 | Khelen et al., 2017 |
| KH41  | Dolostone | Dharwar Craton     | Vempalle III    | HF/HNO <sub>3</sub> | 1.9 | N.D. | 0.24 | 0.4  | N.D.  | 2.83 | Khelen et al., 2017 |
| KH42  | Dolostone | Dharwar Craton     | Vempalle III    | HF/HNO <sub>3</sub> | 1.9 | N.D. | 0.27 | 0.44 | N.D.  | 2.89 | Khelen et al., 2017 |
| KH46  | Dolostone | Dharwar Craton     | Vempalle III    | HF/HNO <sub>3</sub> | 1.9 | N.D. | 0.41 | 0.07 | N.D.  | 27.6 | Khelen et al., 2017 |
| KH48  | Dolostone | Dharwar Craton     | Vempalle III    | HF/HNO <sub>3</sub> | 1.9 | N.D. | 0.56 | 0.07 | N.D.  | 37.7 | Khelen et al., 2017 |
| KH49  | Dolostone | Dharwar Craton     | Vempalle III    | HF/HNO <sub>3</sub> | 1.9 | N.D. | 0.15 | 0.27 | N.D.  | 2.62 | Khelen et al., 2017 |
| KH51  | Dolostone | Dharwar Craton     | Vempalle III    | HF/HNO <sub>3</sub> | 1.9 | N.D. | 4.78 | 0.05 | N.D.  | 450  | Khelen et al., 2017 |
| KH52  | Dolostone | Dharwar Craton     | Vempalle III    | HF/HNO <sub>3</sub> | 1.9 | N.D. | 0.44 | 0.04 | N.D.  | 51.8 | Khelen et al., 2017 |
| KH54A | Dolostone | Dharwar Craton     | Vempalle III    | HF/HNO <sub>3</sub> | 1.9 | N.D. | 0.34 | 0.13 | N.D.  | 12.3 | Khelen et al., 2017 |
| LG001 | Dolostone | Sino-Korean Craton | Guanmenshan Fm. | HF/HNO <sub>3</sub> | 2.2 | 4.83 | 0.23 | 0.03 | 2819  | 42.6 | Tang et al., 2013   |
| LG002 | Dolostone | Sino-Korean Craton | Guanmenshan Fm. | HF/HNO <sub>3</sub> | 2.2 | 2.39 | 0.22 | 0.11 | 308.8 | 9.25 | Tang et al., 2013   |
| LG003 | Dolostone | Sino-Korean Craton | Guanmenshan Fm. | HF/HNO <sub>3</sub> | 2.2 | 4.84 | 0.2  | 0.07 | 1025  | 13.8 | Tang et al., 2013   |
| LG004 | Dolostone | Sino-Korean Craton | Guanmenshan Fm. | HF/HNO <sub>3</sub> | 2.2 | 3.6  | 0.26 | 0.14 | 367.2 | 8.43 | Tang et al., 2013   |
| LG005 | Dolostone | Sino-Korean Craton | Guanmenshan Fm. | HF/HNO <sub>3</sub> | 2.2 | 2.43 | 0.15 | 0.11 | 334.9 | 6.54 | Tang et al., 2013   |
| LG007 | Dolostone | Sino-Korean Craton | Guanmenshan Fm. | HF/HNO <sub>3</sub> | 2.2 | 5.26 | 0.32 | 0.16 | 474.1 | 9.19 | Tang et al., 2013   |
| LG008 | Dolostone | Sino-Korean Craton | Guanmenshan Fm. | HF/HNO <sub>3</sub> | 2.2 | 1.57 | 0.23 | 0.15 | 152.5 | 7.32 | Tang et al., 2013   |
| LG009 | Dolostone | Sino-Korean Craton | Guanmenshan Fm. | HF/HNO <sub>3</sub> | 2.2 | 1.85 | 0.14 | 0.06 | 442.5 | 10.5 | Tang et al., 2013   |
| LG010 | Dolostone | Sino-Korean Craton | Guanmenshan Fm. | HF/HNO <sub>3</sub> | 2.2 | 2.37 | 0.25 | 0.21 | 167.2 | 5.64 | Tang et al., 2013   |
| LG011 | Dolostone | Sino-Korean Craton | Guanmenshan Fm. | HF/HNO <sub>3</sub> | 2.2 | 1.28 | 0.27 | 0.23 | 82.69 | 5.69 | Tang et al., 2013   |
| LG012 | Dolostone | Sino-Korean Craton | Guanmenshan Fm. | HF/HNO <sub>3</sub> | 2.2 | 5.2  | 0.24 | 0.07 | 1054  | 15.4 | Tang et al., 2013   |
| LG013 | Dolostone | Sino-Korean Craton | Guanmenshan Fm. | HF/HNO <sub>3</sub> | 2.2 | 1.95 | 0.13 | 0.01 | 4061  | 86.1 | Tang et al., 2013   |
| LG014 | Dolostone | Sino-Korean Craton | Guanmenshan Fm. | HF/HNO <sub>3</sub> | 2.2 | 1.43 | 0.19 | 0.04 | 595.3 | 25.4 | Tang et al., 2013   |
| LG015 | Dolostone | Sino-Korean Craton | Guanmenshan Fm. | HF/HNO <sub>3</sub> | 2.2 | 2.23 | 0.21 | 0.02 | 1913  | 58.7 | Tang et al., 2013   |
| LG016 | Dolostone | Sino-Korean Craton | Guanmenshan Fm. | HF/HNO <sub>3</sub> | 2.2 | 6.94 | 0.21 | 0.03 | 3267  | 31.3 | Tang et al., 2013   |
| LG017 | Dolostone | Sino-Korean Craton | Guanmenshan Fm. | HF/HNO <sub>3</sub> | 2.2 | 1.77 | 0.17 | 0.02 | 1363  | 41.6 | Tang et al., 2013   |
| LG018 | Dolostone | Sino-Korean Craton | Guanmenshan Fm. | HF/HNO <sub>3</sub> | 2.2 | 1.75 | 0.19 | 0.02 | 1344  | 45.9 | Tang et al., 2013   |
| LG019 | Dolostone | Sino-Korean Craton | Guanmenshan Fm. | HF/HNO <sub>3</sub> | 2.2 | 1.4  | 0.2  | 0.04 | 487.4 | 22.4 | Tang et al., 2013   |
| LG020 | Dolostone | Sino-Korean Craton | Guanmenshan Fm. | HF/HNO <sub>3</sub> | 2.2 | 0.79 | 0.22 | 0.05 | 236.6 | 20.8 | Tang et al., 2013   |

|       |           |                    |                 |                     |     |      |      |      |       |      |                   |
|-------|-----------|--------------------|-----------------|---------------------|-----|------|------|------|-------|------|-------------------|
| LG021 | Dolostone | Sino-Korean Craton | Guanmenshan Fm. | HF/HNO <sub>3</sub> | 2.2 | 2.88 | 0.27 | 0.05 | 792   | 24.3 | Tang et al., 2013 |
| LG022 | Dolostone | Sino-Korean Craton | Guanmenshan Fm. | HF/HNO <sub>3</sub> | 2.2 | 2.36 | 0.23 | 0.03 | 1149  | 35.3 | Tang et al., 2013 |
| LG023 | Dolostone | Sino-Korean Craton | Guanmenshan Fm. | HF/HNO <sub>3</sub> | 2.2 | 1.8  | 1.13 | 0.5  | 52.98 | 10.7 | Tang et al., 2013 |
| LG024 | Dolostone | Sino-Korean Craton | Guanmenshan Fm. | HF/HNO <sub>3</sub> | 2.2 | 1.55 | 0.36 | 0.03 | 868.1 | 65.8 | Tang et al., 2013 |
| LG025 | Dolostone | Sino-Korean Craton | Guanmenshan Fm. | HF/HNO <sub>3</sub> | 2.2 | 3.39 | 0.38 | 0.06 | 797.3 | 28.7 | Tang et al., 2013 |
| LG026 | Dolostone | Sino-Korean Craton | Guanmenshan Fm. | HF/HNO <sub>3</sub> | 2.2 | 1.26 | 0.41 | 0.05 | 341.7 | 35.9 | Tang et al., 2013 |
| LG027 | Dolostone | Sino-Korean Craton | Guanmenshan Fm. | HF/HNO <sub>3</sub> | 2.2 | 1.75 | 0.61 | 0.13 | 202.2 | 22.8 | Tang et al., 2013 |
| LG028 | Dolostone | Sino-Korean Craton | Guanmenshan Fm. | HF/HNO <sub>3</sub> | 2.2 | 3.37 | 0.29 | 0.09 | 579.2 | 16.3 | Tang et al., 2013 |
| LG029 | Dolostone | Sino-Korean Craton | Guanmenshan Fm. | HF/HNO <sub>3</sub> | 2.2 | 1.05 | 0.85 | 0.33 | 47.2  | 12.2 | Tang et al., 2013 |
| LG030 | Dolostone | Sino-Korean Craton | Guanmenshan Fm. | HF/HNO <sub>3</sub> | 2.2 | 3.11 | 1.09 | 0.06 | 781.9 | 88.7 | Tang et al., 2013 |
| LG031 | Dolostone | Sino-Korean Craton | Guanmenshan Fm. | HF/HNO <sub>3</sub> | 2.2 | 2.19 | 0.68 | 0.14 | 225.6 | 22.4 | Tang et al., 2013 |
| LG032 | Dolostone | Sino-Korean Craton | Guanmenshan Fm. | HF/HNO <sub>3</sub> | 2.2 | 9.07 | 0.24 | 0.01 | 14705 | 126  | Tang et al., 2013 |
| LG033 | Dolostone | Sino-Korean Craton | Guanmenshan Fm. | HF/HNO <sub>3</sub> | 2.2 | 1.64 | 0.44 | 0.01 | 2652  | 231  | Tang et al., 2013 |
| LG034 | Dolostone | Sino-Korean Craton | Guanmenshan Fm. | HF/HNO <sub>3</sub> | 2.2 | 1.95 | 0.51 | 0.09 | 327.7 | 27.6 | Tang et al., 2013 |
| LG035 | Dolostone | Sino-Korean Craton | Guanmenshan Fm. | HF/HNO <sub>3</sub> | 2.2 | 4.72 | 0.43 | 0.05 | 1352  | 39.9 | Tang et al., 2013 |
| LG036 | Dolostone | Sino-Korean Craton | Guanmenshan Fm. | HF/HNO <sub>3</sub> | 2.2 | 24.9 | 0.56 | 0.21 | 1768  | 12.8 | Tang et al., 2013 |
| LG038 | Dolostone | Sino-Korean Craton | Guanmenshan Fm. | HF/HNO <sub>3</sub> | 2.2 | 5.02 | 0.61 | 0.06 | 1146  | 45.1 | Tang et al., 2013 |
| LG039 | Dolostone | Sino-Korean Craton | Guanmenshan Fm. | HF/HNO <sub>3</sub> | 2.2 | 2.01 | 0.13 | 0.05 | 598.9 | 12.2 | Tang et al., 2013 |
| LG040 | Dolostone | Sino-Korean Craton | Guanmenshan Fm. | HF/HNO <sub>3</sub> | 2.2 | 3.01 | 0.26 | 0.05 | 914   | 25.4 | Tang et al., 2013 |
| LG041 | Dolostone | Sino-Korean Craton | Guanmenshan Fm. | HF/HNO <sub>3</sub> | 2.2 | 1.14 | 1.2  | 0.06 | 296.7 | 101  | Tang et al., 2013 |
| LG042 | Dolostone | Sino-Korean Craton | Guanmenshan Fm. | HF/HNO <sub>3</sub> | 2.2 | 2.68 | 0.28 | 0.13 | 291.5 | 9.91 | Tang et al., 2013 |
| LG043 | Dolostone | Sino-Korean Craton | Guanmenshan Fm. | HF/HNO <sub>3</sub> | 2.2 | 1    | 0.55 | 0.11 | 132.1 | 23.4 | Tang et al., 2013 |
